# Supplementary material
Source: MDPI journal article supplement (https://www.mdpi.com/2220-9964/11/2/116)
Supplement: s1 [file s1]

Table S1. Mean values of morphometric parameters of river basins on the opposite sides of MDD.

| Parameter                            | Range-scale<br>(see Fig. 7A) |       | Incised into the<br>MDD<br>(see Fig. 7B) |       | Within massifs (see Fig. 7B) |       |       |       |       |       |       |       |       |       |
|--------------------------------------|------------------------------|-------|------------------------------------------|-------|------------------------------|-------|-------|-------|-------|-------|-------|-------|-------|-------|
|                                      |                              |       |                                          |       | I                            |       | II    |       | III   |       | IV    |       | V     |       |
|                                      | NE                           | SW    | NE                                       | SW    | NE                           | SW    | NE    | SW    | NE    | SW    | NE    | SW    | NE    | SW    |
| Hypsometric integral                 | 0.345                        | 0.447 | 0.498                                    | 0.488 | 0.466                        | 0.457 | 0.505 | 0.460 | 0.535 | 0.457 | 0.403 | 0.436 | 0.539 | 0.646 |
| Mean slope                           | 9.2                          | 11.4  | 13.1                                     | 12.2  | 15.4                         | 13.9  | 14.7  | 13.3  | 12.3  | 10.5  | 14.1  | 14.4  | 6.1   | 8.6   |
| Slopes > 20° [%]                     | 9.9                          | 13.7  | 18.7                                     | 16.2  | 23.0                         | 17.8  | 24.1  | 18.0  | 16.3  | 11.4  | 19.1  | 22.9  | 3.7   | 9.8   |
| Slopes > 20° within buffer zones [%] | 10.9                         | 12.9  | 16.7                                     | 13.1  | 24.1                         | 24.0  | 21.6  | 6.2   | 14.6  | 9.3   | 15.1  | 18.3  | 1.0   | 1.0   |
| Basin compactness                    | 0.001                        | 0.003 | 0.004                                    | 0.003 | 0.005                        | 0.005 | 0.003 | 0.001 | 0.006 | 0.003 | 0.001 | 0.002 | 0.002 | 0.002 |
| Basin circularity                    | 0.207                        | 0.268 | 0.339                                    | 0.292 | 0.378                        | 0.329 | 0.335 | 0.280 | 0.349 | 0.256 | 0.330 | 0.322 | 0.284 | 0.256 |
